# Supplementary material for: Highly selective and sensitive colorimetric chemosensor for detection of Co2+ in a near-perfect aqueous solution
Source: Royal Society of Chemistry journal article supplement (doi:10.1039/c6ra03364d), 2016-01-01
Supplement: c6ra03364d1.pdf [file c6ra03364d1.pdf]

## Supporting Information

### **Highly selective and sensitive colorimetric chemosensor for detection of Co<sup>2+</sup> in a near-perfect aqueous solution**

Seong Youl Lee, Jae Jun Lee, Kwon Hee Bok, So Young Kim, Cheal Kim\*

*Department of Fine Chemistry and Department of Interdisciplinary Bio IT Materials, Seoul National University of Science and Technology, Seoul 139-743, Korea. Fax: +82-2-973-9149; Tel: +82-2-970-6693; E-mail: chealkim@seoultech.ac.kr*

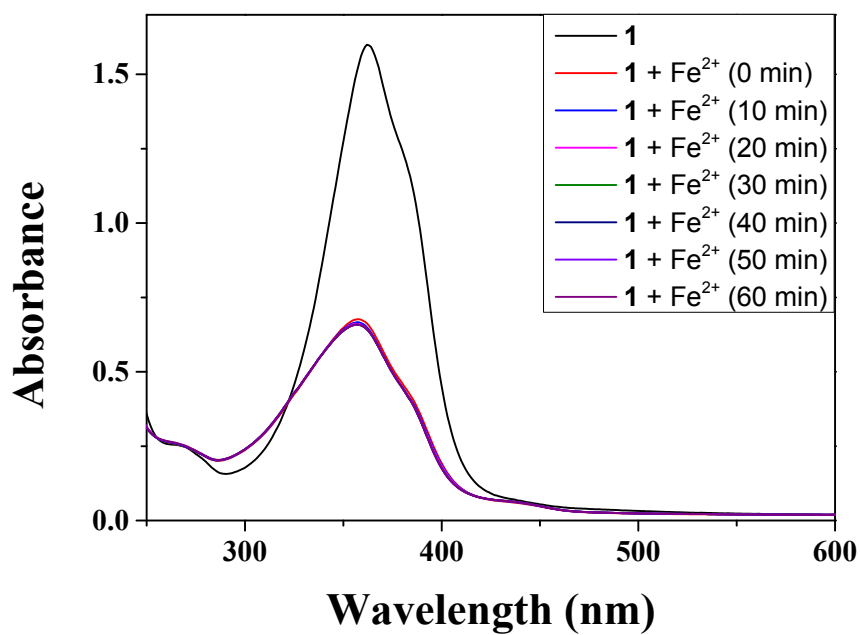

**Fig. S1** Absorption spectral changes of **1** (20  $\mu$ M) for 1 h in the presence of 1.1 equiv of Fe<sup>2+</sup> ion in bis-tris buffer solution (10 mM, pH 7).

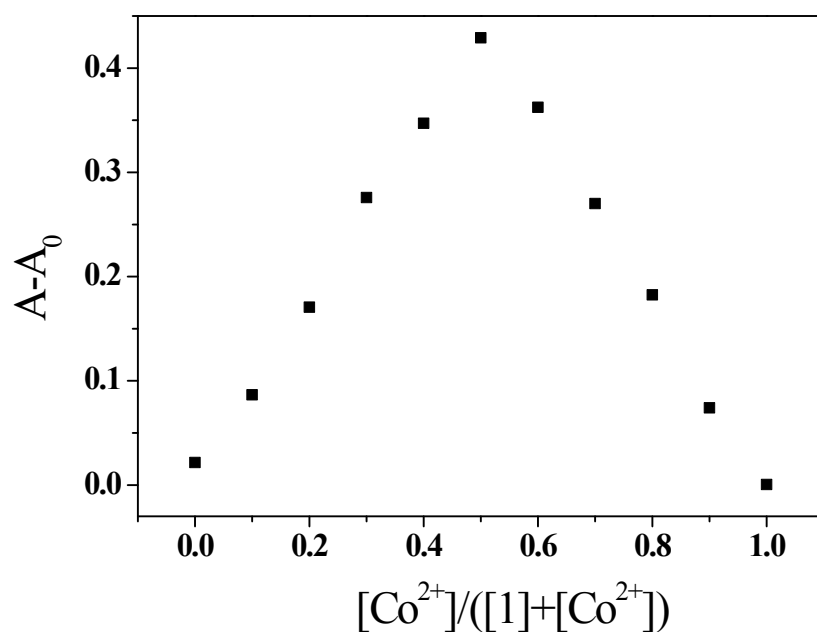

**Fig. S2** Job plot of **1** and  $\text{Co}^{2+}$  in bis-tris buffer solution (10 mM, pH 7). The total concentrations of **1** and  $\text{Co}^{2+}$  were 150  $\mu\text{M}$ .

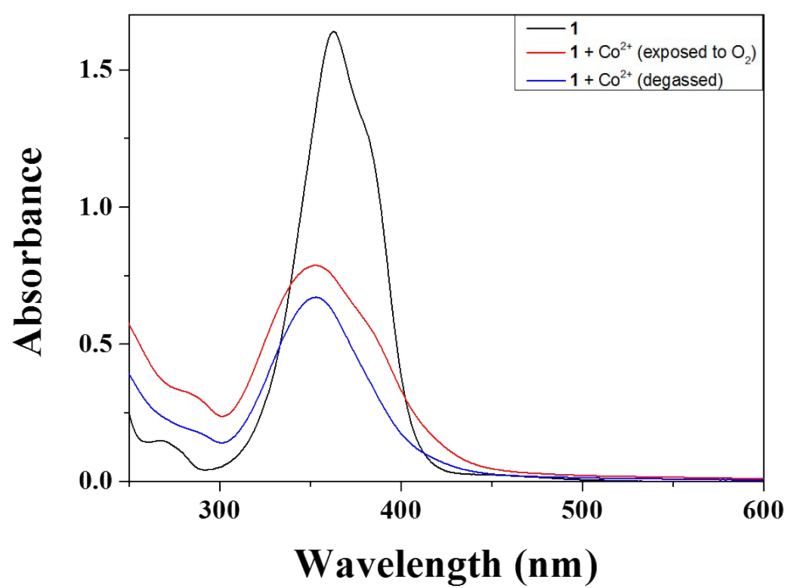

**Fig. S3** Absorption spectra of **1** (20  $\mu$ M) and **1**- Co<sup>2+</sup> under the anaerobic and aerobic conditions, respectively.

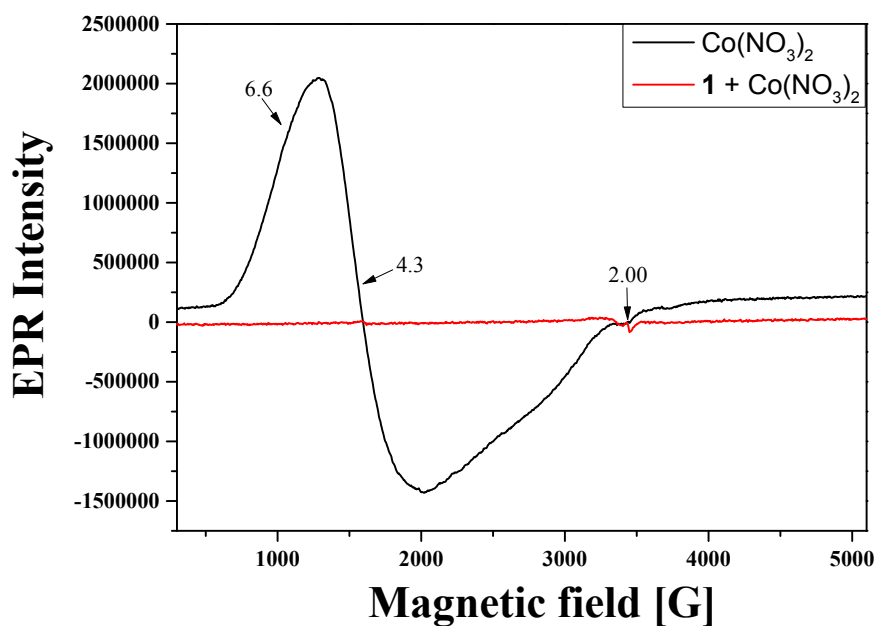

**Fig. S4** X-band EPR spectra of  $\text{Co}(\text{NO}_3)_2$  (black line) and  $\mathbf{1} + \text{Co}(\text{NO}_3)_2$  (red line) recorded at 5 K. Dark line: the  $\text{Co}(\text{NO}_3)_2$  (1 mM) solution in  $\text{CH}_3\text{CN}$  (or  $\text{H}_2\text{O}$ ) was frozen in liquid nitrogen. Red line: the EPR sample was frozen in liquid nitrogen 5 min after  $\mathbf{1}$  (1.2 mM) was mixed with  $\text{Co}(\text{NO}_3)_2$  (1 mM) in  $\text{CH}_3\text{CN}$  (or  $\text{H}_2\text{O}$ ) at room temperature.

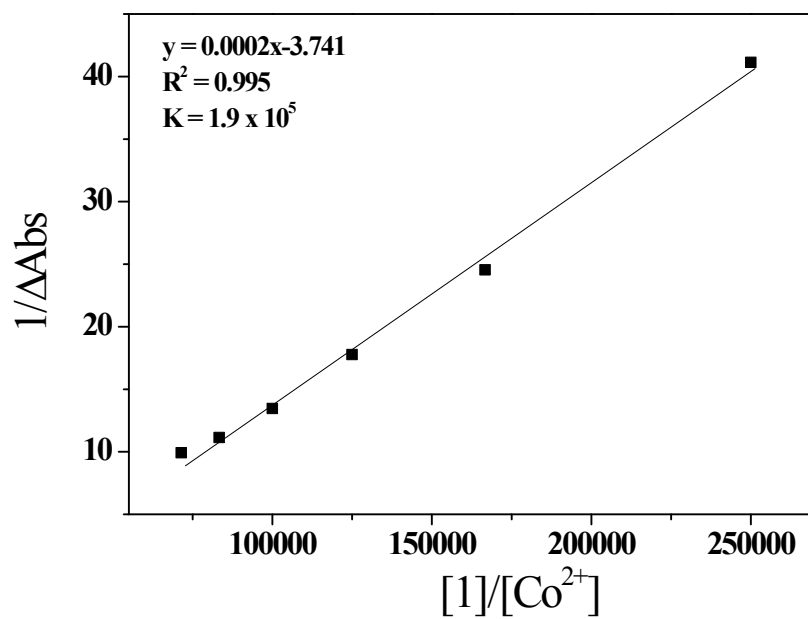

**Fig. S5** Benesi-Hildebrand plot (absorbance at 420 nm) of **1** based on UV-vis titration, assuming 1:1 stoichiometry for association between **1** and  $\text{Co}^{2+}$ .

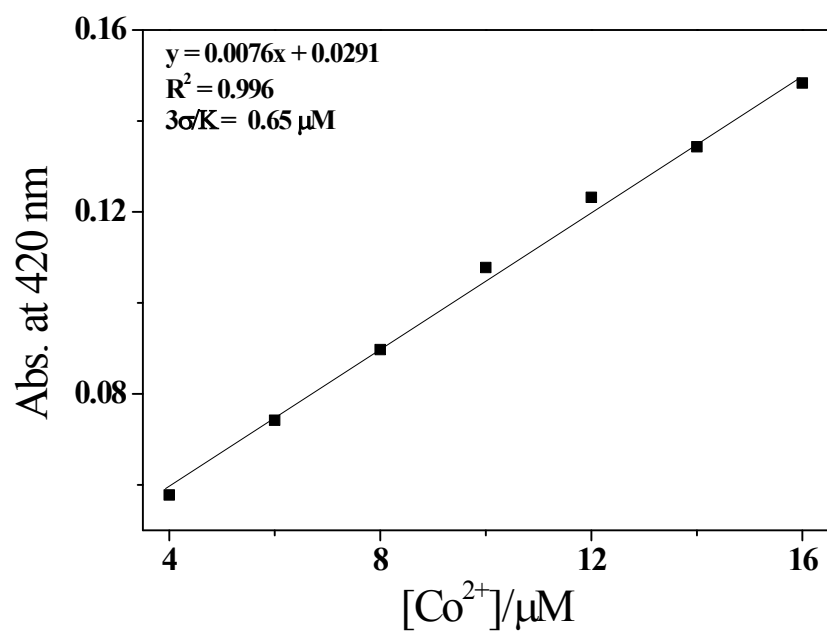

**Fig. S6** Determination of the detection limit based on change in the ratio (absorbance at 420 nm) of **1** (20  $\mu\text{M}$ ) with  $\text{Co}^{2+}$ .

(a)

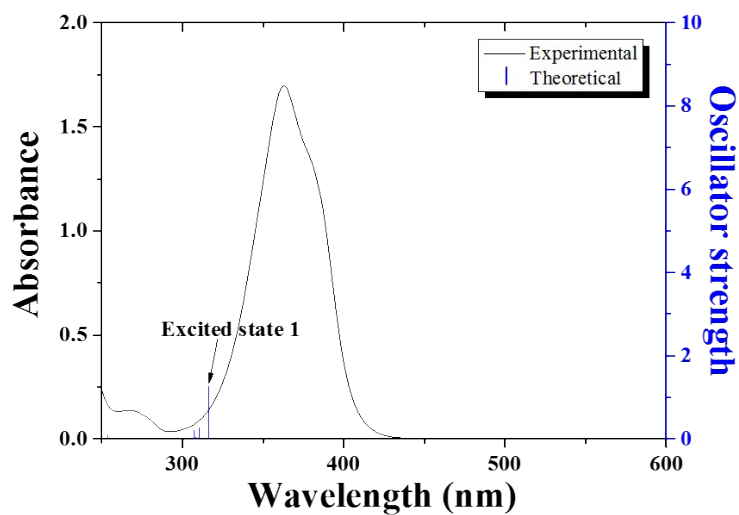

(b)

| Excited state 1 | Wavelength (nm) | Percent (%) | Main character | Oscillator strength |
|-----------------|-----------------|-------------|----------------|---------------------|
| H → L           | 316.49          | 86          | ICT            | 1.265               |
| H - 1 → L + 1   |                 | 12          | ICT            |                     |

**Fig S7.** (a) The theoretical excitation energies and the experimental UV-vis spectrum of **1**. (b) The major electronic transition energies and molecular orbital contributions for **1** (H = HOMO and L = LUMO).



(a)

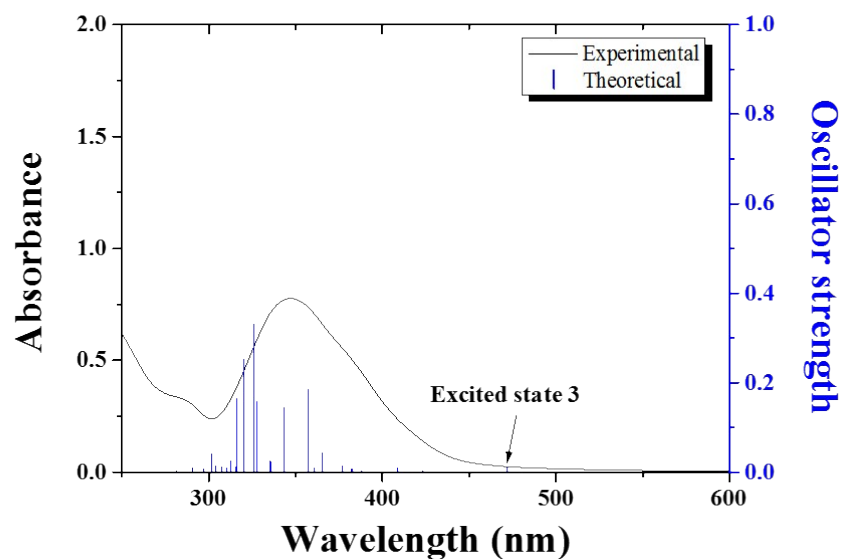

(b)

| Excited state 3 | Wavelength (nm) | Percent (%) | Main character | Oscillator strength |
|-----------------|-----------------|-------------|----------------|---------------------|
| H - 1 → L + 3   | 472.03          | 45          | LMCT           | 0.0102              |
| H - 8 → L + 3   |                 | 15          | LMCT           |                     |
| H - 6 → L + 3   |                 | 9           | LMCT           |                     |
| H - 14 → L + 3  |                 | 3           | LMCT           |                     |
| H - 2 → L + 3   |                 | 2           | LMCT           |                     |

**Fig. S8** (a) The theoretical excitation energies and the experimental UV-vis spectrum of 1-Co<sup>3+</sup>. (b) The major electronic transition energies and molecular orbital contributions for 1-Co<sup>3+</sup> (H = HOMO and L = LUMO).
